# Supplementary material for: Visualizing Alzheimer’s Disease Mouse Brain with Multispectral Optoacoustic Tomography using a Fluorescent probe, CDnir7
Source: PubMed Central journal article supplement (PMC6700105; doi:10.1038/s41598-019-48329-4), 2019-08-19
Supplement: 41598_2019_48329_MOESM1_ESM.pdf [file 41598_2019_48329_MOESM1_ESM.pdf]

Supplementary Information for

**Visualizing Alzheimer's Disease Mouse  
Brain with Multispectral Optoacoustic  
Tomography using a Fluorescent  
Probe, CDnir7**

Park, *et al.*

## Supplementary Information for

# Visualizing Alzheimer's Disease Mouse Brain with Multispectral Optoacoustic Tomography using a Fluorescent probe, CDnir7

Sung-Jin Park<sup>§</sup>, Chris Jun Hui Ho<sup>§</sup>, Satoshi Arai<sup>§</sup>, Animesh Samanta, Malini Olivo,  
Young-Tae Chang\*

<sup>§</sup>These authors contributed equally to this work.

\*Correspondence to Young-Tae Chang (ytchang@postech.ac.kr)

### Contents of this SI file include:

- Supplementary Figure 1 to 6

### Other Supplementary information for this manuscript include:

- Supplementary Movie 1 to 4.

### **List of Supplementary Figures:**

1. **Supplementary Figure 1.** Total haemoglobin signals in control and AD brains by MSOT.
2. **Supplementary Figure 2.** CDnir7 stained pattern in serial sectioned AD brain
3. **Supplementary Figure 3.** Comparison of CDnir7 and vimentin IHC fluorescence images of sectioned AD and healthy control brain tissues.
4. **Supplementary Figure 4.** Intracellular localization of CDnir7
5. **Supplementary Figure 5.** CDnir7 stained pattern in ABC transporter inhibitor treatment.
6. **Supplementary Figure 6.** CDnir7 stained pattern in endocytosis inhibitor treatment.

### **List of Supplementary Movies:**

7. **Supplementary Movie 1.** CDnir7 time trace by MSOT.
8. **Supplementary Movie 2.** CDnir7 stain pattern in 3D reconstruction of control brain.
9. **Supplementary Movie 3.** CDnir7 stain pattern in 3D reconstruction of AD brain.
10. **Supplementary Movie 4.** 3D reconstruction of CDnir7 stained AD brain sections.

## Supplementary Results

### Supplementary Figure 1

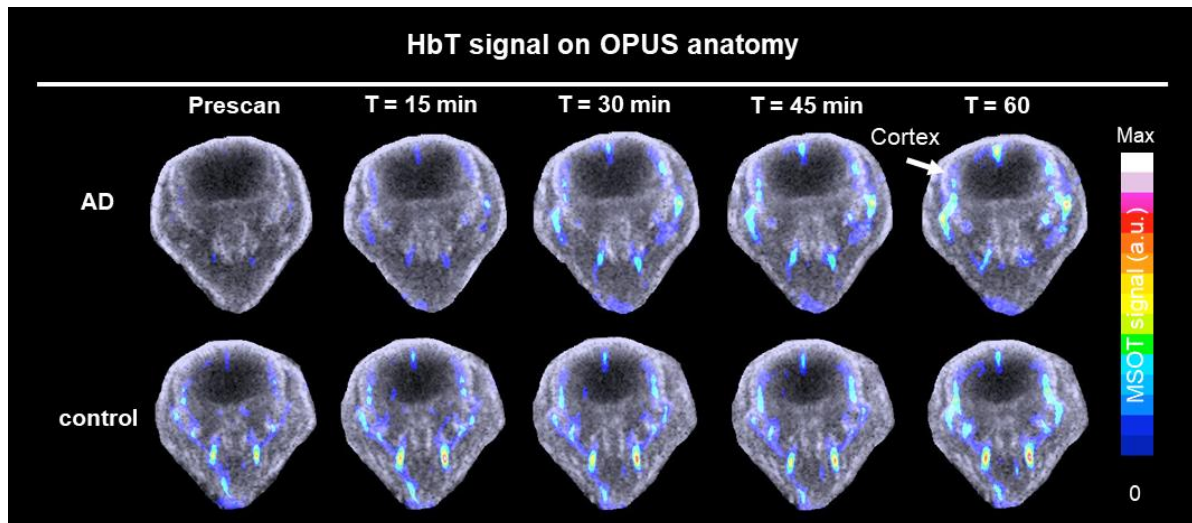

**Supplementary Figure 1. Total haemoglobin signals in control and AD brains by MSOT.** The total haemoglobin (HbT; oxy- and deoxy-haemoglobin) signal analysis by MSOT showed there were no high signals in cortex area in AD brain during 1hr observation.

Supplementary Figure 2

AD + CDnir7

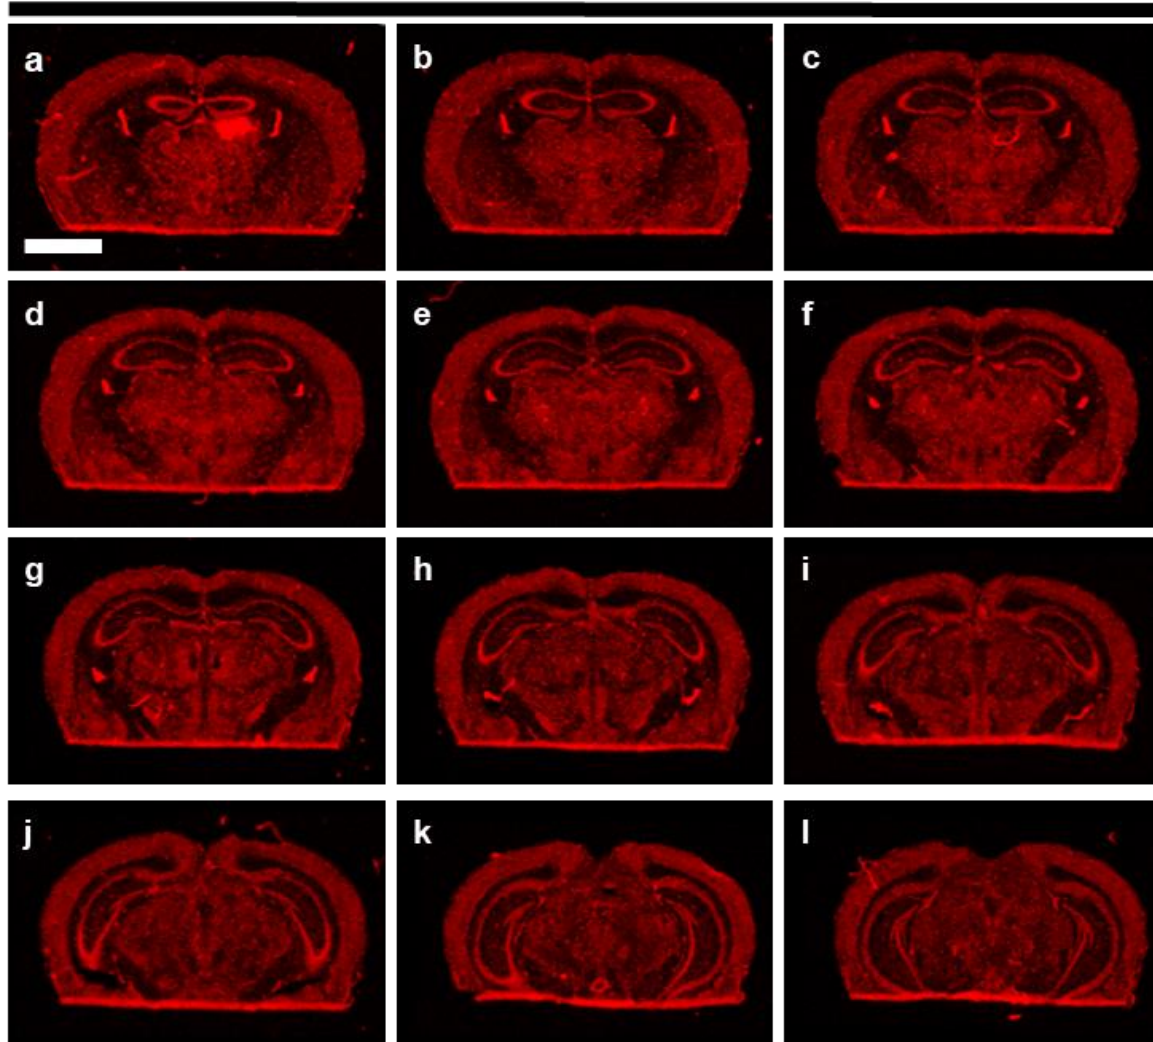

Supplementary Figure 2. CDnir7 stained pattern in serial sectioned AD brain.

a-l. CDnir7 stained brain section images in hippocampal located area of AD brain. The interval of the sectioned brain images was 300 $\mu$ m. Scale bar, 2mm.

### Supplementary Figure 3

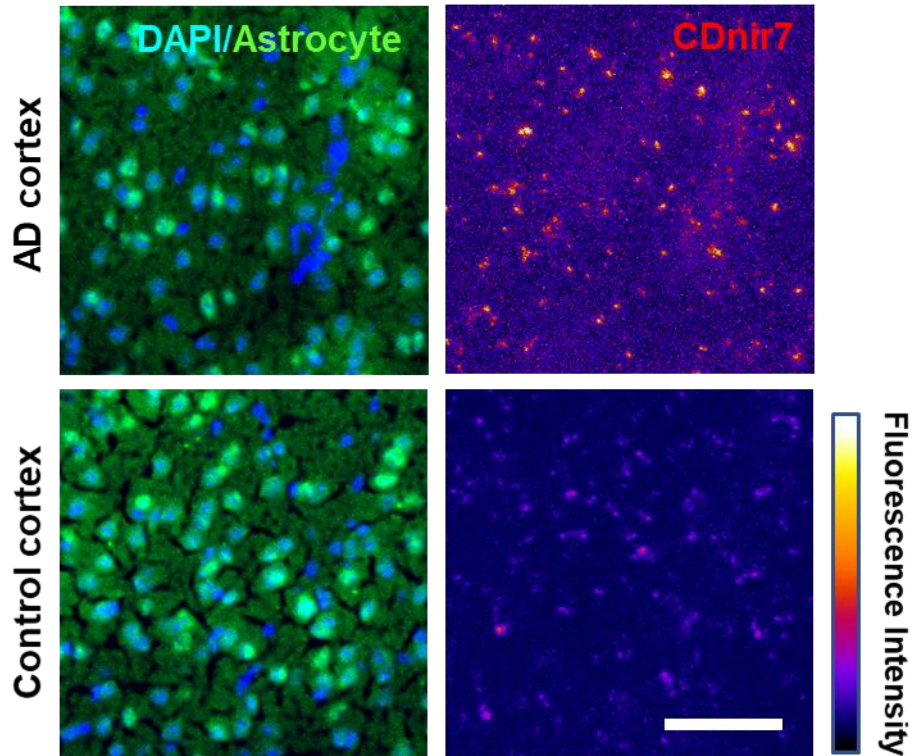

**Supplementary Figure 3. Comparison of CDnir7 and vimentin IHC fluorescence images of sectioned AD and healthy control brain tissues.** CDnir7 and vimentin IHC fluorescence images of AD and control healthy brain cortex tissues were taken by the confocal microscopy. Left panel: DAPI (Blue) and Astrocyte (Green, vimentin IHC) staining. Right panel: CDnir7 fluorescent images after tail vein injection. The sectioned images of CDnir7 were shown at the same pseudo colour range. The scale bar, 50  $\mu\text{m}$ .

#### Supplementary Figure 4

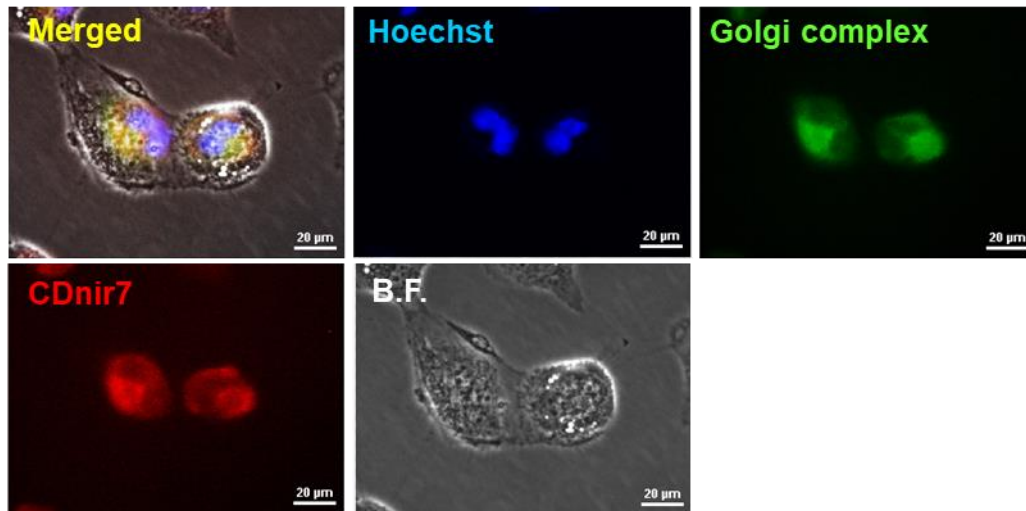

**Supplementary Figure 4. Intracellular localization of CDnir7.** Reactive SF268 astrocyte cancer cell line by CNTF was stained by CDnir7 and BODIPY<sup>TM</sup> TR ceramide, which stains the Golgi complex. CDnir7 staining intracellular area was co-localized with the Golgi complex. Scale bar, 20µm

## Supplementary Figure 5

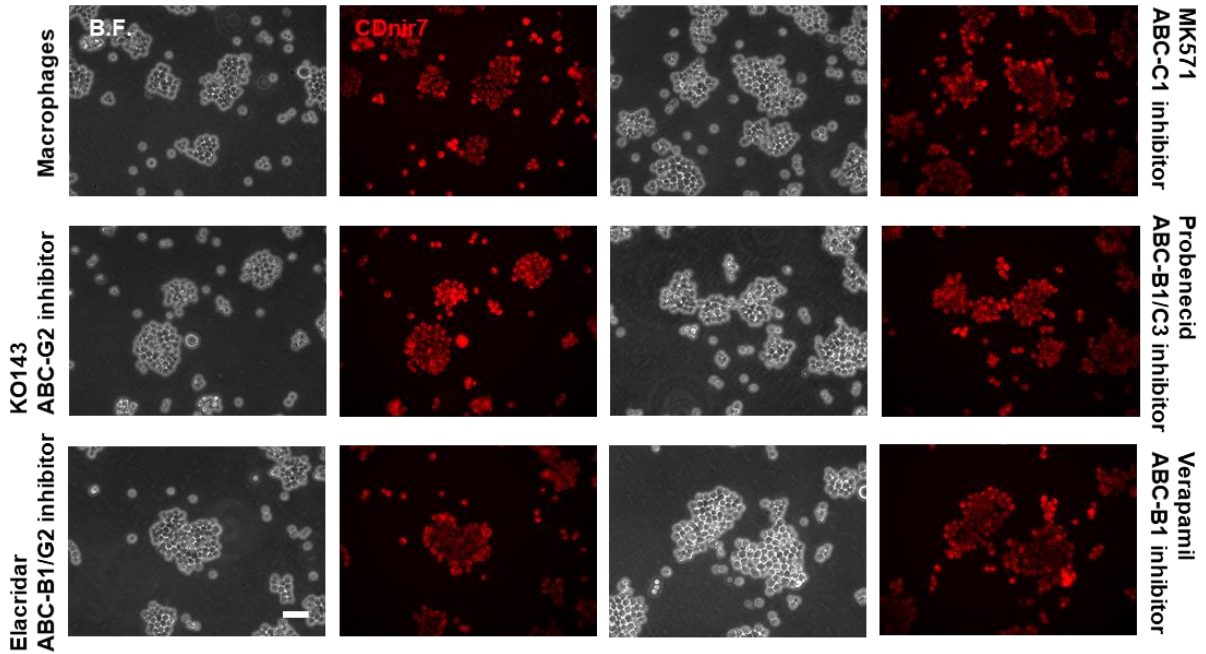

**Supplementary Figure 5. CDnir7 stained pattern in ABC transporter inhibitor treatment.** CDnir7 stained patterns in Raw246.7 cell lines were examined under ABC transporter inhibitors such as KO143 (ABC-G2 inhibition), Elacridar (ABC-B1/G2 inhibition), MK571 (ABC-C1 inhibition), Probenecid (ABC-B1/C3 inhibition) and Verapamil (ABC-B1 inhibition), but there were no prominent responses against each inhibitor. Scale bar, 100 $\mu$ m.



## Supplementary Figure 6

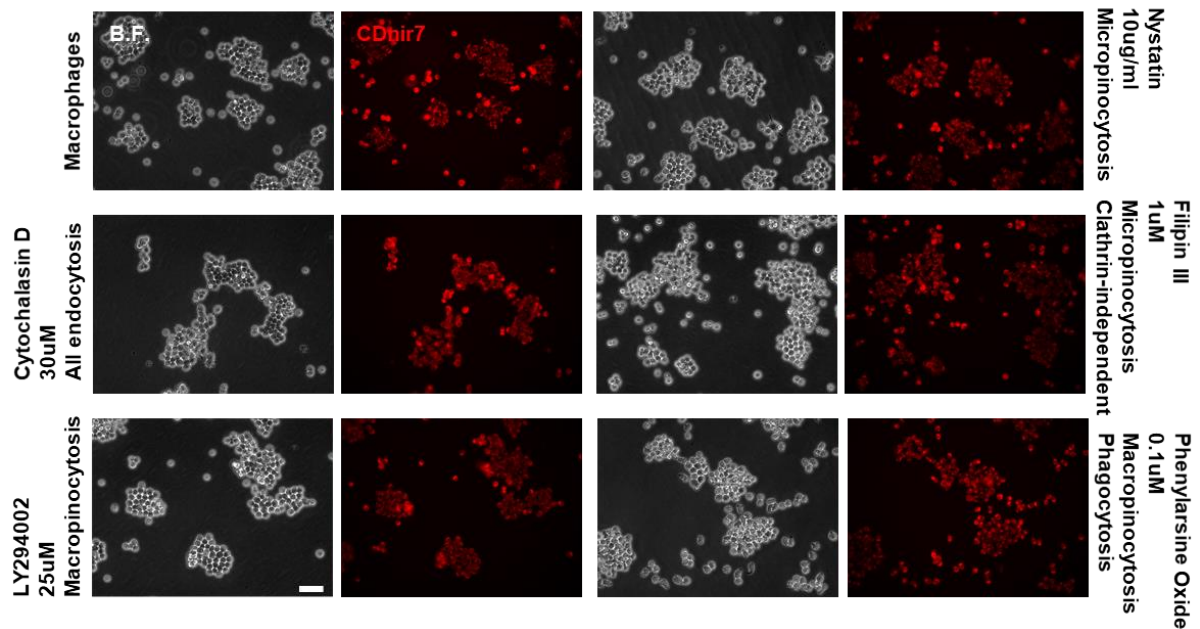

**Supplementary Figure 6. CDnir7 stained pattern in endocytosis inhibitor treatment.** CDnir7 stained patterns in Raw246.7 cell lines were examined under endocytosis inhibitors, as well. Cytochalasin D for all endocytosis inhibition, LY294002 for acropinocytosis inhibition, nystatin for micropinocytosis inhibition, filipin III for microphinoctosis and clathrin-independent inhibition, phenylarsine oxide for micropinocytosis and phagocytosis inhibition were utilised but there were no prominent different between the control and the inhibitor treated groups. Scale bar, 100µm.
